# Supplementary material for: Network Pharmacology Exploration Reveals Gut Microbiota Modulation as a Common Therapeutic Mechanism for Anti-Fatigue Effect Treated with Maca Compounds Prescription
Source: MDPI journal article supplement (doi:10.3390/nu14081533), 2022-04-07
Supplement: s1 [file s1]

Table S1 26 kinds of macamides from Maca

| No.  | Name                                                        | Formula                                         | SMILE                                                             |
|------|-------------------------------------------------------------|-------------------------------------------------|-------------------------------------------------------------------|
| MM01 | N-benzyl-9,16-dioxo-10E,12E,14E-octadecatrienamide          | C <sub>25</sub> H <sub>33</sub> NO <sub>3</sub> | <chem>CCC(=O)\C=C\C=C\C=C\C(=O)CCCC(=O)NCC1=CC=CC=C1</chem>       |
| MM02 | N-benzyl-16(S)-hydroxy-9-oxo-10E,12E,14E-octadecatrienamide | C <sub>25</sub> H <sub>35</sub> NO <sub>3</sub> | <chem>CC[C@H](O)\C=C\C=C\C=C\C(=O)CCCCCCC(=O)NCC1=CC=CC=C1</chem> |
| MM03 | N-benzyl-5-oxo-6E,8E-octadecadienamide                      | C <sub>25</sub> H <sub>37</sub> NO <sub>2</sub> | <chem>CCCCCCCC\C=C\C=C\C(=O)CCC(=O)NCC1=CC=CC=C1</chem>           |
| MM04 | N-benzyl-hexadecanamide                                     | C <sub>23</sub> H <sub>39</sub> NO              | <chem>CCCCCCCCCCCCCCCC(=O)NCC1=CC=CC=C1</chem>                    |
| MM05 | N-benzyl-9-oxo-12Z-octadecenamide                           | C <sub>25</sub> H <sub>39</sub> NO <sub>2</sub> | <chem>CCCC\C=C\CCC(=O)CCCCCCCC(=O)NCC1=CC=CC=C1</chem>            |
| MM06 | N-benzyl-9-oxo-12Z,15Z-octadecadienamide                    | C <sub>25</sub> H <sub>37</sub> NO <sub>2</sub> | <chem>CC\C=C/C\C=C/C\CCC(=O)CCCCCCC(=O)NCC1=CC=CC=C1</chem>       |
| MM07 | N-benzyl-13-oxo-9E,11E-octadecadienamide                    | C <sub>25</sub> H <sub>37</sub> NO <sub>2</sub> | <chem>CCCCCC(=O)\C=C\C=C\CCCCCCC(=O)NCC1=CC=CC=C1</chem>          |
| MM08 | N-benzyl-15Z-tetracosenamide                                | C <sub>31</sub> H <sub>53</sub> NO              | <chem>CCCCCCCC\C=C/CCCCCCCCCCCCC(=O)NCC1=CC=CC=C1</chem>          |
| MM09 | N-(m-methoxybenzyl)-hexadecanamide                          | C <sub>24</sub> H <sub>41</sub> NO <sub>2</sub> | <chem>CCCCCCCCCCCCCCCC(=O)NCC1=CC(OC)=CC=C1</chem>                |
| MM10 | N-benzyl-9Z-octadecenamide                                  | C <sub>25</sub> H <sub>41</sub> NO              | <chem>CCCCCCCC\C=C\CCCCCCCC(=O)NCC1=CC=CC=C1</chem>               |
| MM11 | N-(m-methoxybenzyl)-9Z-octadecenamide                       | C <sub>26</sub> H <sub>43</sub> NO <sub>2</sub> | <chem>CCCCCCCC\C=C\CCCCCCCC(=O)NCC1=CC(OC)=CC=C1</chem>           |
| MM12 | N-benzyl-9Z,12Z-octadecadienamide                           | C <sub>25</sub> H <sub>39</sub> NO              | <chem>CCCC\C=C\C\C=C\CCCCCCCC(=O)NCC1=CC=CC=C1</chem>             |
| MM13 | N-(m-methoxybenzyl)-9Z,12Z-octadecadienamide                | C <sub>26</sub> H <sub>41</sub> NO <sub>2</sub> | <chem>CCCC\C=C\C\C=C\CCCCCCCC(=O)NCC1=CC(OC)=CC=C1</chem>         |
| MM14 | N-benzyl-9Z,12Z,15Z-octadecatrienamide                      | C <sub>25</sub> H <sub>37</sub> NO              | <chem>CC\C=C\C\C=C\C\C=C\CCCCCCCC(=O)NCC1=CC=CC=C1</chem>         |
| MM15 | N-(m-methoxybenzyl)-9Z,12Z,15Z-octadecatrienamide           | C <sub>26</sub> H <sub>39</sub> NO <sub>2</sub> | <chem>CC\C=C\C\C=C\C\C=C\CCCCCCCC(=O)NCC1=CC(OC)=CC=C1</chem>     |
| MM16 | N-benzyl-octadecanamide                                     | C <sub>25</sub> H <sub>43</sub> NO              | <chem>CCCCCCCCCCCCCCCCCCCC(=O)NCC1=CC=CC=C1</chem>                |
| MM17 | N-benzyl-pentadecanamide                                    | C <sub>22</sub> H <sub>37</sub> NO              | <chem>CCCCCCCCCCCCCCCC(=O)NCC1=CC=CC=C1</chem>                    |
| MM18 | N-benzyl-heptadecanamide                                    | C <sub>24</sub> H <sub>41</sub> NO              | <chem>CCCCCCCCCCCCCCCCCCCC(=O)NCC1=CC=CC=C1</chem>                |
| MM19 | N-benzyl-octanamide                                         | C <sub>15</sub> H <sub>23</sub> NO              | <chem>CCCCCCCC(=O)NCC1=CC=CC=C1</chem>                            |
| MM20 | N-(m-methoxybenzyl)-octanamide                              | C <sub>16</sub> H <sub>25</sub> NO              | <chem>CCCCCCCC(=O)NCC1=CC(OC)=CC=C1</chem>                        |
| MM21 | N-(3,4-dimethoxybenzyl)-hexadecanamide                      | C <sub>25</sub> H <sub>43</sub> NO <sub>3</sub> | <chem>CCCCCCCCCCCCCCCCCCCC(=O)NCC1=CC(OC)=C(OC)C=C1</chem>        |

|      |                                          |                                                 |                                                     |
|------|------------------------------------------|-------------------------------------------------|-----------------------------------------------------|
| MM22 | N-benzyl-tetracosanamide                 | C <sub>31</sub> H <sub>55</sub> NO              | CCCCCCCCCCCCCCCCCCCCCCCCCCCC<br>C(=O)NCC1=CC=CC=C1  |
| MM23 | N-benzyl-2E-octadecadienamide            | C <sub>25</sub> H <sub>41</sub> NO              | CCCCCCCCCCCCCCCCC\C=C\C(=O)N<br>CC1=CC=CC=C1        |
| MM24 | N-benzyl-9-oxo-10E,12E-octadecadienamide | C <sub>25</sub> H <sub>37</sub> NO <sub>2</sub> | CCCCC\C=C\C=C\C(=O)CCCCCCC<br>C(=O)NCC1=CC=CC=C1    |
| MM25 | N-benzyl-9-oxo-10E,12Z-octadecadienamide | C <sub>25</sub> H <sub>37</sub> NO <sub>2</sub> | CCCCC\C=C/C=C/C(=O)CCCCCCC<br>C(=O)NCC1=CC=CC=C1    |
| MM26 | N-(3,4-dimethoxybenzyl)-9Z-oleamide      | C <sub>27</sub> H <sub>45</sub> NO <sub>3</sub> | CCCCCCCCC\C=C/CCCCCCCC(=O)N<br>CC1=CC(OC)=C(OC)C=C1 |

**Table S2 Potential active ingredients of Maca compound preparation**

|                                            | No.  | Chemical composition                                     | Molecular                                                     | OB%   | DL%  |
|--------------------------------------------|------|----------------------------------------------------------|---------------------------------------------------------------|-------|------|
| Citrus<br>reticulata<br>Blanco<br>(Chenpi) | CP01 | carotene                                                 | C <sub>40</sub> H <sub>56</sub>                               | 37.18 | 0.58 |
|                                            | CP02 | citromitin                                               | C <sub>21</sub> H <sub>24</sub> O <sub>8</sub>                | 86.90 | 0.51 |
|                                            | CP03 | nobiletin                                                | C <sub>27</sub> H <sub>32</sub> O <sub>14</sub>               | 61.67 | 0.52 |
|                                            | CP04 | obacunone                                                | C <sub>26</sub> H <sub>30</sub> O <sub>7</sub>                | 81.58 | 0.57 |
|                                            | CP05 | β-sitosterol                                             | C <sub>29</sub> H <sub>50</sub> O                             | 33.94 | 0.70 |
|                                            | CP06 | sitosterol                                               | C <sub>29</sub> H <sub>50</sub> O                             | 36.91 | 0.75 |
|                                            | CP07 | 5,7-dihydroxy-2-(3-hydroxy-4-methoxyphenyl)chroman-4-one | C <sub>16</sub> H <sub>14</sub> O <sub>6</sub>                | 47.74 | 0.27 |
|                                            | CP08 | naringenin                                               | C <sub>15</sub> H <sub>12</sub> O <sub>5</sub>                | 59.29 | 0.21 |
| Angelica<br>sinensis<br>(Danggui)          | DG01 | chrysanthemaxanthin                                      | C <sub>40</sub> H <sub>56</sub> O <sub>3</sub>                | 38.72 | 0.58 |
|                                            | DG02 | cnidilin                                                 | C <sub>17</sub> H <sub>16</sub> O <sub>5</sub>                | 32.69 | 0.28 |
|                                            | DG03 | folinicacid                                              | C <sub>20</sub> H <sub>23</sub> N <sub>7</sub> O <sub>7</sub> | 31.79 | 0.74 |
|                                            | DG04 | isoimperatorin                                           | C <sub>16</sub> H <sub>14</sub> O <sub>4</sub>                | 45.46 | 0.23 |
|                                            | DG05 | phyllanthin                                              | C <sub>24</sub> H <sub>34</sub> O <sub>6</sub>                | 33.31 | 0.42 |
|                                            | DG06 | suchilactone                                             | C <sub>21</sub> H <sub>20</sub> O <sub>6</sub>                | 57.52 | 0.56 |
|                                            | DG07 | beta-sitosterol                                          | C <sub>29</sub> H <sub>50</sub> O                             | 36.91 | 0.75 |
|                                            | DG08 | Stigmasterol                                             | C <sub>29</sub> H <sub>48</sub> O                             | 43.83 | 0.76 |
| Codonopsis<br>pilosula<br>(Dangshen)       | DS01 | 5alpha-stigmastan-3,6-dione                              | C <sub>29</sub> H <sub>48</sub> O <sub>2</sub>                | 33.12 | 0.79 |
|                                            | DS02 | 5α-stigmasta-7,22-dien-3-one                             | C <sub>29</sub> H <sub>46</sub> O                             | 42.98 | 0.76 |
|                                            | DS03 | alpha-spinasterol                                        | C <sub>29</sub> H <sub>48</sub> O                             | 42.98 | 0.76 |
|                                            | DS04 | chrysanthemaxanthin                                      | C <sub>40</sub> H <sub>56</sub> O <sub>3</sub>                | 38.72 | 0.58 |
|                                            | DS05 | daturilin                                                | C <sub>28</sub> H <sub>36</sub> O <sub>4</sub>                | 50.37 | 0.77 |
|                                            | DS06 | diisocapryl phthalate                                    | C <sub>24</sub> H <sub>38</sub> O <sub>4</sub>                | 43.59 | 0.39 |
|                                            | DS07 | friedelin                                                | C <sub>30</sub> H <sub>50</sub> O                             | 29.16 | 0.76 |
|                                            | DS08 | frutinone a                                              | C <sub>16</sub> H <sub>8</sub> O <sub>4</sub>                 | 65.9  | 0.34 |
|                                            | DS09 | glycitein                                                | C <sub>16</sub> H <sub>12</sub> O <sub>5</sub>                | 50.48 | 0.24 |
|                                            | DS10 | methyl octadecadienoate                                  | C <sub>19</sub> H <sub>34</sub> O <sub>2</sub>                | 41.93 | 0.17 |
|                                            | DS11 | stigmasta-5                                              | C <sub>29</sub> H <sub>48</sub> O                             | 36.91 | 0.75 |
|                                            | DS12 | stigmasta-5,22-dien-3-one                                | C <sub>29</sub> H <sub>46</sub> O                             | 43.83 | 0.76 |
|                                            | DS13 | taraxerol                                                | C <sub>30</sub> H <sub>50</sub> O                             | 38.4  | 0.77 |

|                                               |      |                                                                                                                                                              |                                                               |        |      |
|-----------------------------------------------|------|--------------------------------------------------------------------------------------------------------------------------------------------------------------|---------------------------------------------------------------|--------|------|
|                                               | DS14 | $\alpha$ -spinasterol                                                                                                                                        | C <sub>29</sub> H <sub>48</sub> O                             | 42.98  | 0.76 |
|                                               | DS15 | 3-beta-Hydroxymethyllenetanshiquinone                                                                                                                        | C <sub>18</sub> H <sub>14</sub> O <sub>4</sub>                | 32.16  | 0.41 |
|                                               | DS16 | luteolin                                                                                                                                                     | C <sub>15</sub> H <sub>10</sub> O <sub>6</sub>                | 36.16  | 0.25 |
|                                               | DS17 | stigmast-7-enol                                                                                                                                              | C <sub>29</sub> H <sub>50</sub> O                             | 37.42  | 0.75 |
|                                               | DS18 | 7-(beta-Xylosyl)cephalomannine Qt                                                                                                                            | C <sub>43</sub> H <sub>53</sub> O <sub>13</sub> N             | 38.33  | 0.29 |
|                                               | DS19 | methyl icosan-11,14-dienoate                                                                                                                                 | C <sub>21</sub> H <sub>38</sub> O <sub>2</sub>                | 39.67  | 0.23 |
|                                               | DS20 | Spinosioid A                                                                                                                                                 | C <sub>39</sub> H <sub>56</sub> O <sub>12</sub>               | 39.97  | 0.4  |
|                                               | DS21 | 11-Hydroxyrankinidine                                                                                                                                        | C <sub>18</sub> H <sub>22</sub> O <sub>4</sub> N <sub>2</sub> | 40     | 0.66 |
|                                               | DS22 | 7-Methoxy-2-methyl isoflavone                                                                                                                                | C <sub>17</sub> H <sub>14</sub> O <sub>3</sub>                | 42.56  | 0.2  |
|                                               | DS23 | poriferasta-7,22E-dien-3beta-ol                                                                                                                              | C <sub>29</sub> H <sub>48</sub> O                             | 42.98  | 0.76 |
|                                               | DS24 | Spinasterol                                                                                                                                                  | C <sub>29</sub> H <sub>48</sub> O                             | 42.98  | 0.76 |
|                                               | DS25 | Diop                                                                                                                                                         | C <sub>24</sub> H <sub>38</sub> O <sub>4</sub>                | 43.59  | 0.39 |
|                                               | DS26 | ZINC03978781                                                                                                                                                 | C <sub>29</sub> H <sub>48</sub> O                             | 43.83  | 0.76 |
|                                               | DS27 | Stigmasterol                                                                                                                                                 | C <sub>29</sub> H <sub>48</sub> O                             | 43.83  | 0.76 |
|                                               | DS28 | (8S,9S,10R,13R,14S,17R)-17-[(E,2R,5S)-5-ethyl-6-methylhept-3-en-2-yl]-10,13-dimethyl-1,2,4,7,8,9,11,12,14,15,16,17-dodecahydrocyclopenta[a]phenanthren-3-one | C <sub>29</sub> H <sub>46</sub> O                             | 45.4   | 0.76 |
| <i>Polygonatum sibiricum Red. (Huangjing)</i> | HJ01 | DFV                                                                                                                                                          | C <sub>15</sub> H <sub>12</sub> O <sub>4</sub>                | 32.76  | 0.18 |
|                                               | HJ02 | baicalein                                                                                                                                                    | C <sub>15</sub> H <sub>10</sub> O <sub>5</sub>                | 33.52  | 0.21 |
|                                               | HJ03 | 3'-Methoxydaidzein                                                                                                                                           | C <sub>16</sub> H <sub>12</sub> O <sub>5</sub>                | 48.57  | 0.24 |
|                                               | HJ04 | beta-sitosterol                                                                                                                                              | C <sub>29</sub> H <sub>50</sub> O                             | 36.91  | 0.75 |
|                                               | HJ05 | sitosterol                                                                                                                                                   | C <sub>29</sub> H <sub>50</sub> O                             | 36.91  | 0.75 |
|                                               | HJ06 | methylprotodioscin Qt                                                                                                                                        | C <sub>28</sub> H <sub>46</sub> O <sub>3</sub>                | 35.12  | 0.86 |
|                                               | HJ07 | (2R)-7-hydroxy-2-(4-hydroxyphenyl)chroman-4-one                                                                                                              | C <sub>15</sub> H <sub>12</sub> O <sub>4</sub>                | 71.12  | 0.18 |
|                                               | HJ08 | diosgenin                                                                                                                                                    | C <sub>27</sub> H <sub>42</sub> O <sub>3</sub>                | 80.88  | 0.81 |
|                                               | HJ09 | 4',5'-Dihydroxyflavone                                                                                                                                       | C <sub>15</sub> H <sub>10</sub> O <sub>4</sub>                | 48.55  | 0.19 |
|                                               | HJ10 | sibiricoside A Qt                                                                                                                                            | C <sub>27</sub> H <sub>44</sub> O <sub>4</sub>                | 35.26  | 0.86 |
|                                               | HJ11 | Syringaresinol-O-beta-D-glucoside                                                                                                                            | C <sub>28</sub> H <sub>36</sub> O <sub>13</sub>               | 43.35  | 0.77 |
|                                               | HJ12 | zhonghualiaoine 1                                                                                                                                            | C <sub>29</sub> H <sub>48</sub> O <sub>3</sub>                | 34.72  | 0.78 |
| <i>Astragalus membranaceus (Huangqi)</i>      | HQ01 | isoflavanone                                                                                                                                                 | C <sub>16</sub> H <sub>14</sub> O <sub>6</sub>                | 109.99 | 0.3  |
|                                               | HQ02 | 7-O-methylisomucronulatol                                                                                                                                    | C <sub>18</sub> H <sub>20</sub> O <sub>5</sub>                | 74.69  | 0.3  |
|                                               | HQ03 | formononetin                                                                                                                                                 | C <sub>16</sub> H <sub>12</sub> O <sub>4</sub>                | 69.67  | 0.21 |
|                                               | HQ04 | FA                                                                                                                                                           | C <sub>19</sub> H <sub>19</sub> N <sub>7</sub> O <sub>6</sub> | 68.96  | 0.71 |
|                                               | HQ05 | (3R)-3-(2-hydroxy-3,4-dimethoxyphenyl)chroman-7-ol                                                                                                           | C <sub>17</sub> H <sub>18</sub> O <sub>5</sub>                | 67.67  | 0.26 |
|                                               | HQ06 | (6aR,11aR)-9,10-dimethoxy-6a,11a-dihydro-6H-benzofurano[3,2-c]chromen-3-ol                                                                                   | C <sub>17</sub> H <sub>16</sub> O <sub>5</sub>                | 64.26  | 0.42 |
|                                               | HQ07 | Mairin                                                                                                                                                       | C <sub>30</sub> H <sub>48</sub> O <sub>3</sub>                | 55.38  | 0.78 |
|                                               | HQ08 | 3,9-di-O-methylnissolin                                                                                                                                      | C <sub>18</sub> H <sub>18</sub> O <sub>5</sub>                | 53.74  | 0.48 |
|                                               | HQ09 | Jaranol                                                                                                                                                      | C <sub>17</sub> H <sub>14</sub> O <sub>6</sub>                | 50.83  | 0.29 |
|                                               | HQ10 | isorhamnetin                                                                                                                                                 | C <sub>16</sub> H <sub>12</sub> O <sub>7</sub>                | 49.6   | 0.31 |
|                                               | HQ11 | isomucronulatol-7,2'-di-O-glucosiole                                                                                                                         | C <sub>29</sub> H <sub>38</sub> O <sub>15</sub>               | 49.28  | 0.62 |

|                                       |      |                                                                                                                                                                   |                                                                 |        |      |
|---------------------------------------|------|-------------------------------------------------------------------------------------------------------------------------------------------------------------------|-----------------------------------------------------------------|--------|------|
|                                       | HQ12 | Calycosin                                                                                                                                                         | C <sub>16</sub> H <sub>12</sub> O <sub>5</sub>                  | 47.75  | 0.24 |
|                                       | HQ13 | quercetin                                                                                                                                                         | C <sub>15</sub> H <sub>10</sub> O <sub>7</sub>                  | 46.43  | 0.28 |
|                                       | HQ14 | kaempferol                                                                                                                                                        | C <sub>15</sub> H <sub>10</sub> O <sub>6</sub>                  | 41.88  | 0.24 |
|                                       | HQ15 | 5'-hydroxyiso-muronulatol-2',5'-di-O-glucoside                                                                                                                    | C <sub>29</sub> H <sub>38</sub> O <sub>16</sub>                 | 41.72  | 0.69 |
|                                       | HQ16 | 1,7-Dihydroxy-3,9-dimethoxy pterocarpene                                                                                                                          | C <sub>17</sub> H <sub>14</sub> O <sub>6</sub>                  | 39.05  | 0.48 |
|                                       | HQ17 | hederagenin                                                                                                                                                       | C <sub>29</sub> H <sub>50</sub> O                               | 36.91  | 0.75 |
|                                       | HQ18 | 9,10-dimethoxypterocarpan-3-O-β-D-glucoside                                                                                                                       | C <sub>23</sub> H <sub>28</sub> O <sub>10</sub>                 | 36.74  | 0.92 |
|                                       | HQ19 | (3S,8S,9S,10R,13R,14S,17R)-10,13-dimethyl-17-[(2R,5S)-5-propan-2-yloctan-2-yl]-2,3,4,7,8,9,11,12,14,15,16,17-dodecahydro-1H-cyclopenta[a]phenanthren-3-ol         | C <sub>30</sub> H <sub>52</sub> O                               | 36.23  | 0.78 |
|                                       | HQ20 | Bifendate                                                                                                                                                         | C <sub>20</sub> H <sub>18</sub> O <sub>10</sub>                 | 31.1   | 0.67 |
|                                       | HQ21 | astragalosideI Qt                                                                                                                                                 | C <sub>39</sub> H <sub>62</sub> O <sub>11</sub>                 | 12.34  | 0.2  |
|                                       | HQ22 | astragalosideII Qt                                                                                                                                                | C <sub>37</sub> H <sub>60</sub> O <sub>10</sub>                 | 11.55  | 0.25 |
|                                       | HQ23 | astragalosideIV Qt                                                                                                                                                | C <sub>35</sub> H <sub>58</sub> O <sub>9</sub>                  | 7.07   | 0.32 |
|                                       | HQ24 | astragalosideIII Qt                                                                                                                                               | C <sub>35</sub> H <sub>58</sub> O <sub>9</sub>                  | 5.35   | 0.32 |
|                                       | HQ25 | medicarpin                                                                                                                                                        | C <sub>16</sub> H <sub>14</sub> O <sub>4</sub>                  | 49.22  | 0.34 |
|                                       | HQ26 | chrysanthemaxanthin                                                                                                                                               | C <sub>40</sub> H <sub>56</sub> O <sub>3</sub>                  | 38.72  | 0.58 |
|                                       | HQ27 | kumatakenin                                                                                                                                                       | C <sub>17</sub> H <sub>14</sub> O <sub>6</sub>                  | 50.83  | 0.29 |
|                                       | HQ28 | β-sitosterol                                                                                                                                                      | C <sub>27</sub> H <sub>30</sub> O <sub>12</sub>                 | 33.94  | 0.7  |
| <i>Amomum villosum</i> Lour. (Sharen) | SR01 | meletin                                                                                                                                                           | C <sub>15</sub> H <sub>10</sub> O <sub>7</sub>                  | 46.43  | 0.28 |
|                                       | SR02 | quercetin                                                                                                                                                         | C <sub>15</sub> H <sub>9</sub> O <sub>7</sub>                   | 46.43  | 0.28 |
|                                       | SR03 | stigmasterol                                                                                                                                                      | C <sub>30</sub> H <sub>50</sub>                                 | 43.83  | 0.76 |
|                                       | SR04 | 24-Ethylcholest-4-en-3-one                                                                                                                                        | C <sub>29</sub> H <sub>48</sub> O                               | 36.08  | 0.76 |
|                                       | SR05 | poriferast-5-en-3β-ol                                                                                                                                             | C <sub>29</sub> H <sub>50</sub> O                               | 36.91  | 0.75 |
|                                       | SR06 | Sitosteryl acetate                                                                                                                                                | C <sub>31</sub> H <sub>52</sub> O <sub>2</sub>                  | 40.39  | 0.85 |
|                                       | SR07 | β-sitosterol                                                                                                                                                      | C <sub>29</sub> H <sub>50</sub> O                               | 36.91  | 0.75 |
|                                       | SR08 | icosa-11,14,17-trienoic acid methyl ester                                                                                                                         | C <sub>21</sub> H <sub>36</sub> O <sub>2</sub>                  | 44.81  | 0.23 |
|                                       | SR09 | vitamin-e                                                                                                                                                         | C <sub>24</sub> H <sub>34</sub> N <sub>4</sub> O <sub>5</sub> S | 32.29  | 0.7  |
|                                       | SR10 | methyl icosa-11,14-dienoate                                                                                                                                       | C <sub>21</sub> H <sub>38</sub> O <sub>2</sub>                  | 39.67  | 0.23 |
|                                       | SR11 | (5S,8S,9S,10R,13R,14S,17R)-17-[(1R,4R)-4-ethyl-1,5-dimethylhexyl]-10,13-dimethyl-2,4,5,7,8,9,11,12,14,15,16,17-dodecahydro-1H-cyclopenta[a]phenanthrene-3,6-dione | C <sub>29</sub> H <sub>48</sub> O <sub>2</sub>                  | 33.12  | 0.79 |
|                                       | SR12 | Stigmasta-5,22-dien-3-β-yl acetate                                                                                                                                | C <sub>31</sub> H <sub>50</sub> O <sub>2</sub>                  | 46.44  | 0.86 |
| <i>Druce</i> (Yuzhu)                  | YZ01 | 3-o-β-D-glucopyranosyl-(1-2)-[β-D-xylopyranosyl-(1-3)]-β-D-glucopyranosyl-(1-4)-galactopyranosyl-25(S)-spirost-5(6)-en-3β,14α-diol Qt                             | C <sub>27</sub> H <sub>42</sub> O <sub>4</sub>                  | 104.58 | 0.79 |
|                                       | YZ02 | 4',5,7-trihydroxy-6-methyl-8-methoxy-homoisoflavanone                                                                                                             | C <sub>18</sub> H <sub>18</sub> O <sub>6</sub>                  | 89.7   | 0.33 |

|      |                                                                           |                                                 |        |      |
|------|---------------------------------------------------------------------------|-------------------------------------------------|--------|------|
| YZ03 | 4',5,7-trihydroxy-6,8-dimethyl-homoisoflavanone                           | C <sub>18</sub> H <sub>18</sub> O <sub>5</sub>  | 59.76  | 0.3  |
| YZ04 | polygosides E_qt                                                          | C <sub>27</sub> H <sub>36</sub> O <sub>3</sub>  | 38.73  | 0.78 |
| YZ05 | 4',5,7-trihydroxy-6-methyl-homoisoflavanone                               | C <sub>17</sub> H <sub>18</sub> O <sub>5</sub>  | 82.94  | 0.27 |
| YZ06 | 4'-methoxy-5,7-dihydroxy-6,8-dimethyl-homoisoflavanone                    | C <sub>19</sub> H <sub>22</sub> O <sub>5</sub>  | 57.14  | 0.34 |
| YZ07 | n-coumaroyltyramine                                                       | C <sub>17</sub> H <sub>17</sub> NO <sub>3</sub> | 85.63  | 0.2  |
| YZ08 | (Z)-3-(4-hydroxy-3-methoxy-phenyl)-N-[2-(4-hydroxyphenyl)ethyl]acrylamide | C <sub>18</sub> H <sub>19</sub> NO <sub>4</sub> | 118.35 | 0.26 |

**Table S3 Target information of potential active ingredients of Maca compound preparations**

| No. | Uniprot ID | Target protein                                   | Target gene | Frequency |
|-----|------------|--------------------------------------------------|-------------|-----------|
| 1   | P03372     | Estrogen receptor alpha                          | ESR1        | 47        |
| 2   | P30542     | Adenosine A1 receptor                            | ADORA1      | 38        |
| 3   | P29274     | Adenosine A2a receptor (by homology)             | ADORA2A     | 38        |
| 4   | P12931     | Tyrosine-protein kinase SRC                      | SRC         | 31        |
| 5   | P23975     | Norepinephrine transporter                       | SLC6A2      | 31        |
| 6   | P37231     | Peroxisome proliferator-activated receptor gamma | PPARG       | 31        |
| 7   | P08185     | Corticosteroid binding globulin                  | SERPINA6    | 29        |
| 8   | P31645     | Serotonin transporter                            | SLC6A4      | 29        |
| 9   | P08581     | Hepatocyte growth factor receptor                | MET         | 28        |
| 10  | P0DMS8     | Adenosine A3 receptor                            | ADORA3      | 27        |
| 11  | P33261     | Cytochrome P450 2C19                             | CYP2C19     | 27        |
| 12  | P04150     | Glucocorticoid receptor                          | NR3C1       | 26        |
| 13  | P42336     | PI3-kinase p110-alpha subunit                    | PIK3CA      | 26        |
| 14  | Q9UNQ0     | ATP-binding cassette sub-family G member 2       | ABCG2       | 24        |
| 15  | P00533     | Epidermal growth factor receptor erbB1           | EGFR        | 24        |
| 16  | Q16678     | Cytochrome P450 1B1                              | CYP1B1      | 23        |
| 17  | Q9Y233     | Phosphodiesterase 10A                            | PDE10A      | 23        |
| 18  | P11413     | Glucose-6-phosphate 1-dehydrogenase              | G6PD        | 23        |
| 19  | P42345     | Serine/threonine-protein kinase mTOR             | MTOR        | 23        |
| 20  | P27338     | Monoamine oxidase B                              | MAOB        | 21        |
| 21  | P10721     | Stem cell growth factor receptor                 | KIT         | 21        |
| 22  | P36888     | Tyrosine-protein kinase receptor FLT3            | FLT3        | 21        |
| 23  | P28223     | Serotonin 2a (5-HT2a) receptor (by homology)     | HTR2A       | 20        |
| 24  | P21397     | Monoamine oxidase A                              | MAOA        | 19        |
| 25  | Q9UM73     | ALK tyrosine kinase receptor                     | ALK         | 19        |
| 26  | O14965     | Serine/threonine-protein kinase Aurora-A         | AURKA       | 18        |
| 27  | P00519     | Tyrosine-protein kinase ABL                      | ABL1        | 18        |
| 28  | P00734     | Thrombin                                         | F2          | 18        |
| 29  | P14780     | Matrix metalloproteinase 9                       | MMP9        | 17        |

|    |        |                                                            |          |    |
|----|--------|------------------------------------------------------------|----------|----|
| 30 | P05177 | Cytochrome P450 1A2                                        | CYP1A2   | 17 |
| 31 | P29275 | Adenosine A2b receptor                                     | ADORA2B  | 17 |
| 32 | P42338 | PI3-kinase p110-beta subunit                               | PIK3CB   | 16 |
| 33 | O00329 | PI3-kinase p110-delta subunit                              | PIK3CD   | 16 |
| 34 | O14746 | Telomerase reverse transcriptase                           | TERT     | 15 |
| 35 | P14416 | Dopamine D2 receptor (by homology)                         | DRD2     | 14 |
| 36 | P11362 | Fibroblast growth factor receptor 1                        | FGFR1    | 14 |
| 37 | Q08499 | Phosphodiesterase 4D                                       | PDE4D    | 13 |
| 38 | P07900 | Heat shock protein HSP 90-alpha                            | HSP90AA1 | 12 |
| 39 | P09619 | Platelet-derived growth factor receptor beta               | PDGFRB   | 12 |
| 40 | P27986 | PI3-kinase p85-alpha subunit                               | PIK3R1   | 12 |
| 41 | P35462 | Dopamine D3 receptor                                       | DRD3     | 12 |
| 42 | O60674 | Tyrosine-protein kinase JAK2                               | JAK2     | 11 |
| 43 | P11802 | Cyclin-dependent kinase 4                                  | CDK4     | 11 |
| 44 | Q01959 | Dopamine transporter                                       | SLC6A3   | 11 |
| 45 | O76074 | Phosphodiesterase 5A                                       | PDE5A    | 10 |
| 46 | P60568 | Interleukin-2                                              | IL2      | 10 |
| 47 | P31749 | Serine/threonine-protein kinase AKT                        | AKT1     | 10 |
| 48 | Q13946 | Phosphodiesterase 7A                                       | PDE7A    | 9  |
| 49 | P36544 | Neuronal acetylcholine receptor protein alpha-7 subunit    | CHRNA7   | 9  |
| 50 | P10415 | Apoptosis regulator Bcl-2                                  | BCL2     | 9  |
| 51 | P08684 | Cytochrome P450 3A4                                        | CYP3A4   | 9  |
| 52 | P15056 | Serine/threonine-protein kinase B-raf                      | BRAF     | 9  |
| 53 | Q06124 | Protein-tyrosine phosphatase 2C                            | PTPN11   | 9  |
| 54 | P42574 | Caspase-3                                                  | CASP3    | 8  |
| 55 | Q02750 | Dual specificity mitogen-activated protein kinase kinase 1 | MAP2K1   | 8  |
| 56 | P11712 | Cytochrome P450 2C9                                        | CYP2C9   | 8  |
| 57 | Q07343 | Phosphodiesterase 4B                                       | PDE4B    | 8  |
| 58 | P21728 | Dopamine D1 receptor                                       | DRD1     | 8  |
| 59 | P04049 | Serine/threonine-protein kinase RAF                        | RAF1     | 8  |
| 60 | P13500 | C-C motif chemokine 2                                      | CCL2     | 8  |
| 61 | P15692 | Vascular endothelial growth factor A                       | VEGFA    | 7  |
| 62 | P78527 | DNA-dependent protein kinase                               | PRKDC    | 7  |
| 63 | P27815 | Phosphodiesterase 4A                                       | PDE4A    | 7  |
| 64 | P08246 | Leukocyte elastase                                         | ELANE    | 7  |
| 65 | P98170 | Inhibitor of apoptosis protein 3                           | XIAP     | 7  |
| 66 | O00408 | Phosphodiesterase 2A                                       | PDE2A    | 6  |
| 67 | P01375 | TNF-alpha                                                  | TNF      | 6  |
| 68 | P05164 | Myeloperoxidase                                            | MPO      | 6  |
| 69 | Q08493 | Phosphodiesterase 4C                                       | PDE4C    | 6  |
| 70 | P40763 | Signal transducer and activator of transcription 3         | STAT3    | 6  |
| 71 | O76083 | Phosphodiesterase 9A                                       | PDE9A    | 5  |

|     |        |                                                                  |          |   |
|-----|--------|------------------------------------------------------------------|----------|---|
| 72  | P41180 | Calcium sensing receptor                                         | CASR     | 5 |
| 73  | P27169 | Serum paraoxonase/arylesterase 1                                 | PON1     | 5 |
| 74  | Q06187 | Tyrosine-protein kinase BTK                                      | BTK      | 5 |
| 75  | P07949 | Kinesin-1 heavy chain/ Tyrosine-protein kinase receptor RET      | RET      | 4 |
| 76  | P41235 | Hepatocyte nuclear factor 4-alpha                                | HNF4A    | 4 |
| 77  | P22607 | Fibroblast growth factor receptor 3                              | FGFR3    | 4 |
| 78  | P08908 | Serotonin 1a (5-HT1a) receptor                                   | HTR1A    | 4 |
| 79  | Q14432 | Phosphodiesterase 3                                              | PDE3A    | 4 |
| 80  | Q13370 | Phosphodiesterase 3B                                             | PDE3B    | 4 |
| 81  | P04626 | Receptor protein-tyrosine kinase erbB-2                          | ERBB2    | 4 |
| 82  | P36897 | TGF-beta receptor type I                                         | TGFBR1   | 4 |
| 83  | P10635 | Cytochrome P450 2D6                                              | CYP2D6   | 4 |
| 84  | Q14524 | Sodium channel protein type V alpha subunit                      | SCN5A    | 3 |
| 85  | P10276 | Retinoic acid receptor alpha                                     | RARA     | 3 |
| 86  | O75874 | Isocitrate dehydrogenase [NADP] cytoplasmic                      | IDH1     | 3 |
| 87  | P00558 | Phosphoglycerate kinase 1                                        | PGK1     | 3 |
| 88  | P04798 | Cytochrome P450 1A1                                              | CYP1A1   | 3 |
| 89  | P35368 | Alpha-1b adrenergic receptor                                     | ADRA1B   | 3 |
| 90  | O95263 | Phosphodiesterase 8B                                             | PDE8B    | 2 |
| 91  | P16234 | Platelet-derived growth factor receptor alpha                    | PDGFRA   | 2 |
| 92  | P01112 | Transforming protein p21/H-Ras-1                                 | HRAS     | 2 |
| 93  | P11217 | Muscle glycogen phosphorylase                                    | PYGM     | 2 |
| 94  | P14222 | Perforin-1                                                       | PRF1     | 2 |
| 95  | P21964 | Catechol O-methyltransferase                                     | COMT     | 2 |
| 96  | P46098 | Serotonin 3a (5-HT3a) receptor (by homology)                     | HTR3A    | 2 |
| 97  | P04062 | Beta-glucocerebrosidase                                          | GBA      | 2 |
| 98  | P21802 | Fibroblast growth factor receptor 2                              | FGFR2    | 2 |
| 99  | P11166 | Glucose transporter                                              | SLC2A1   | 2 |
| 100 | P19525 | Interferon-induced, double-stranded RNA-activated protein kinase | EIF2AK2  | 2 |
| 101 | Q9Y6K1 | DNA (cytosine-5)-methyltransferase 3A                            | DNMT3A   | 1 |
| 102 | Q13315 | Serine-protein kinase ATM                                        | ATM      | 1 |
| 103 | Q9HCR9 | Phosphodiesterase 11A                                            | PDE11A   | 1 |
| 104 | P19438 | Tumor necrosis factor receptor R1                                | TNFRSF1A | 1 |
| 105 | P01137 | Transforming growth factor beta-1                                | TGFB1    | 1 |
| 106 | P29475 | Nitric-oxide synthase, brain                                     | NOS1     | 1 |
| 107 | Q9HC29 | Nucleotide-binding oligomerization domain-containing protein 2   | NOD2     | 1 |
| 108 | Q9Y2R2 | Hematopoietic cell protein-tyrosine phosphatase 70Z-PEP          | PTPN22   | 1 |
| 109 | Q01064 | Phosphodiesterase 1B                                             | PDE1B    | 1 |
| 110 | Q09472 | Histone acetyltransferase p300                                   | EP300    | 1 |
| 111 | Q01432 | AMP deaminase 3                                                  | AMPD3    | 1 |

|     |        |                                              |       |   |
|-----|--------|----------------------------------------------|-------|---|
| 112 | P05362 | Intercellular adhesion molecule-1            | ICAM1 | 1 |
| 113 | Q9Y5N1 | Histamine H3 receptor                        | HRH3  | 1 |
| 114 | P21554 | Cannabinoid receptor 1                       | CNR1  | 1 |
| 115 | Q99250 | Sodium channel protein type II alpha subunit | SCN2A | 1 |
| 116 | P16499 | Phosphodiesterase 6A                         | PDE6A | 1 |
